# Supplementary material for: Uncertainties in OCO-2 satellite retrievals of XCO 2 limit diagnosis of transport model simulation uncertainty
Source: Copernicus journal article supplement (doi:10.5194/egusphere-2024-3976), 2025-01-21
Supplement: Supplementary file [file egusphere-2024-3976-AC1-supplement.pdf]

1. Das et al. analyzed differences between MIROC-ACTM simulated atmospheric CO<sub>2</sub> profiles and observations from aircraft and OCO-2. While the paper's title claims to focus on understanding how OCO-2 satellite retrieval uncertainties limit the diagnosis of transport model simulation uncertainty, the actual analysis presented does not address this question. The paper is poorly written with unclear reasoning and numerous grammatical errors. The quality does not satisfy ACP standards. I do not recommend this paper for publication based on the following major concerns:

[Reply] We sincerely thank the reviewer for the time and effort in reviewing our manuscript and highlighting the major concerns. We also appreciate the comment on grammatical errors. In the revised version, we have tried our best to correct the writing style, and we have also made extra analysis, statistical significance tests, updating figures, and summary tables. Changes are reflected in the abstract and in the other sections.

Because the revisions are very significant throughout the manuscript, a revised draft is supplied with this reply for your reference, which will be further improved for clarity when we are allowed to revise our discussion article.

2. Scope and Focus: Analyzing transport uncertainty requires examining tracer (e.g., CO<sub>2</sub>) vertical and meridional profiles. However, satellite retrieval algorithms have known limitations in resolving vertical details from XCO<sub>2</sub> measurements. Using satellite vertical CO<sub>2</sub> retrievals to analyze transport uncertainty is fundamentally limited. A meaningful study should examine how biases in vertical profiles derived from OCO-2 XCO<sub>2</sub> could affect transport analysis (e.g., vertical mixing or PBL mixing). The manuscript fails to address these fundamental aspects of transport uncertainty analysis.

[Reply] We appreciate your comment. ACTM simulations have been evaluated against both vertical and meridional CO<sub>2</sub> profiles (~10-14 km for ATom) (Figure S2; <https://zenodo.org/records/14504067>). For better clarification, we modified L160 sentence to: “*Then, the model simulation is evaluated by comparing with zonal and meridional vertical CO<sub>2</sub> profile from ATom campaign as well as at two surface sites, MLO (19.53 °N, 155.57 °W) and SYO (69.01 °S, 35.59 °W), representative site of CO<sub>2</sub> variability in the northern and southern hemisphere (Fig. S2,3,4)*”.

While it is true that satellite retrievals have limitations in resolving vertical details, however, sustained efforts have progressively reduced retrieval error (Kiel et al., 2019; O'Dell et al., 2018; Taylor et al., 2023). Despite these limitations, satellite retrieval remains essential tracking global CO<sub>2</sub> variation due to the sparsely situated in-situ sites worldwide. Therefore, we believe understanding retrieval uncertainties is critical for further improving their accuracy and transport model evaluations. Various revisions to the manuscript is made to show the usefulness of OCO-2 data.

3. Methodological Issues: Analysing model or data biases always requires establishing a 'ground truth'. This paper compares MIROC-ACTM simulated atmospheric CO<sub>2</sub> profiles with observations from aircraft and OCO-2. However, it is not clear what is considered as the truth and what is being analysed. The authors keep switching between these three models/products to evaluate the other two. In some cases, the authors consider MIROC-ACTM model simulation as the truth, which has certain limitations. My understanding is that the model output is the forward transport of a posterior flux, which was derived using only surface station data. However, the column-averaged model data might still be biased due to transport errors of the parent transport model and any additional bias from the inversion setup. It is fine to establish this model output as the truth, but the authors need to show that the column average could represent the observed column average.

[Reply] We would like to clarify that we have not considered the ACTM output as the 'ground truth'. We used surface-based and aircraft CO<sub>2</sub> measurements as truth, as they provide the most accurate CO<sub>2</sub> measurements. To avoid any confusion we have clearly mentioned it in the abstract “*In this study, we used MIROC4–ACTM simulations, surface and aircraft observations (ATom, Amazon, and CONTRAIL projects - considered as ground truth), and Orbiting Carbon Observatory–2 (OCO–2) XCO<sub>2</sub> covering*

2015–2021”. We have also mentioned in introduction(L83) and data and methodology section (L100-102).

To ensure a rigorous ACTM evaluation vertically, we validated ACTM simulations against vertical CO<sub>2</sub> profile (~12-14 km) from ATom campaign (Fig.S2; <https://zenodo.org/records/14504067>) and column average (XCO<sub>2</sub>) (top of the atmosphere to surface) from TCCON sites (Fig. S5). This is mentioned in the data and methodology section.

4.The method description part lacks many details. For example, how was the column average calculated? How do you compare XCO<sub>2</sub> with aircraft column averages, considering they have different spatial coverage? Overall, the sampling strategy comparisons between different observation types need more careful consideration. The criteria for comparing different observational datasets need better justification. The statistical treatment of uncertainties requires more rigour. For example, what do you mean by variability? When you say there is a difference, is it significant?

[Reply] Great Point! We added the following sentence in the data analysis section (L220), “*Then, pressure-weighted partial column CO<sub>2</sub> is calculated for each of this tropospheric layers considering air mass variation between pressure levels (Chandra et al., 2017) to compare with OCO–2 XCO<sub>2</sub> and assess ACTM simulation*”.

We appreciate your question. We would like to clarify first that ACTM simulated CO<sub>2</sub> is sampled at the nearest grid of aircraft, surface, and OCO-2 observation locations and closest time of measurements within 0.5 hour. Following the sampling, we take spatial and time averaging appropriately before presentation of model-observations.

#### **Comparisons of MIROC4-ACTM simulation with OCO–2 retrievals and surface measurements:**

Here, we calculate the monthly differences in XCO<sub>2</sub> between ACTM and OCO-2. Following a similar approach, we also compute the CO<sub>2</sub> differences between ACTM and surface observations for the corresponding months. This is clearly mentioned in section 3.1 (L232, L275).

#### **Comparisons of MIROC4-ACTM simulation with OCO–2 retrievals and aircraft measurements:**

We considered OCO–2 retrievals of XCO<sub>2</sub> within a 5° × 5° grid centered around the aircraft sampling locations and for the same dates. This is mentioned on L324-326. We have revised the text to convey this clearly without confusion and it reads as follows: “*We also calculated differences in XCO<sub>2</sub> between the model and OCO–2 by considering XCO<sub>2</sub> data points within a 5°×5° grid box centered around aircraft sampling locations and during aircraft CO<sub>2</sub> measuring dates (co-located aircraft and satellite)*”.

“*Variability*” refers to the one-sigma standard deviation (1σ-STDEV) of the CO<sub>2</sub> differences between model simulations and observations. This variability is calculated either across time (e.g., for Amazon and CONTRAIL campaigns) or across space (e.g., for ATom campaign). We have clearly mentioned this usage at relevant parts and also captioned (L338, L363-365, L442, etc) it in the figure in the revised manuscript.

Thanks for raising this point. Following your suggestion, we have done one-sample t-test for checking the statistical significance of the estimated CO<sub>2</sub> difference. Now, p-values are included along with CO<sub>2</sub> differences values in the revised draft. We added the following sentence on L226 in the data analysis section, “*Lastly, to assess the significance of CO<sub>2</sub> differences in each vertical layer, we applied a one-sample t-test (Gerald, 2018).*”

5. Writing and Organization: The manuscript suffers from severe organisational and writing issues that significantly impair its readability and scientific credibility. The logical flow is persistently problematic, with paragraphs lacking clear structure and transitions, making it extremely difficult to follow the authors' reasoning. Most sections and paragraphs lack topic sentences to guide readers through the

argument progression. The paper's overall organization is confusing, with little logical connection between sections, making it challenging to understand how different components of the analysis relate to each other. The manuscript is also filled with grammatical errors, suggesting it has not been properly proofread. The writing style lacks scientific rigor and precision - many statements are made without proper justification or clear explanation, and technical terms are used inconsistently. Here are a few examples (I cannot list all instances due to the extensive number of vague presentations and grammatical errors).

[Reply] We have reorganized the draft by restructuring sections into clear, concise paragraphs with smooth transitions, consistent terminology, and focused topic sentences with proper justifications (to the best of our ability). Additional improvements include corrected grammar, new analyses, statistical significance tests, updated figures with data counts, and a new summary table. We sincerely hope that the article now qualifies the standard of ACP.

1. L242: "lesser" is incorrect usage

[Reply] Thank you very much for this and other minor suggestions below. We have used "less" instead.

2. L244: "Negative difference" is vague; better to specify low or high

[Reply] Done. Now "Negative difference" is replaced with "low" here and other places.

3. L249: The bias referenced is undefined

[Reply] We removed the sentence. We find it unnecessary.

4. L250: "some regions" is too vague

[Reply] We find it vague and unnecessary so we have removed it in the revised version.

5.L269: "CO<sub>2</sub>\_in-situ" is vague, as aircraft data could also be in-situ measurements

[Reply] Thanks for spotting that. We have changed it to: "CO<sub>2</sub>\_Surface" to avoid the confusion.

6.L278-280: The focus of this sentence is unclear

[Reply] Deleted this sentence since we find this statement redundant here.

7.L282: "The vast part of the region" - which region?

[Reply] To avoid misinterpretation, we revised the sentence to: "*Since surface-based CO<sub>2</sub> measuring sites are only available at specific locations, it remains challenging to evaluate model near the surface in region without CO<sub>2</sub> monitoring stations*"

8.L349-350: "These differences are..." - this statement lacks supporting analysis

[Reply] We have added citation and the sentence now reads as "*This high difference in LT is likely due to uncertainties in prior surface CO<sub>2</sub> flux, poorly constrained by the sparse surface measurement network of 50 sites, as previous studies have shown that CO<sub>2</sub> change in the lower-most model layer is predominantly influenced by surface CO<sub>2</sub> fluxes (Law et al., 2008; Patra et al., 2008)*".

9.L378-379: "This essentially..." - this statement lacks supporting evidence

[Reply] We deleted this sentence and added the following sentence to bring more clarity "*A high difference, however, is observed near 60° W, which coincides with a region of very few OCO-2 XCO<sub>2</sub> data points around 60° S, 60° W (Fig. S13-ATom-3)*"

10.L384: "Needs further ..." is an incomplete sentence

[Reply] We have revised the sentence to improve readability "*Dynamical process in this region, related to the stratosphere-troposphere exchange, can lead to steep CO<sub>2</sub> gradient between upper troposphere and lower stratosphere during the austral spring and autumn season i.e., ATom-3 and ATom-4 period respectively. This gradient is less constrained in ACTM transport may also contribute to this observed difference (Fig. S10; Bisht et al., 2021)*"

11.L425-429: This content belongs in the introduction/motivation section

[Reply] We agree with the reviewer's comment. We have deleted these sentences, as we also found them unnecessary at this point.

## References:

Chandra, N., Patra, P. K., Niwa, Y., Ito, A., Iida, Y., Goto, D., Morimoto, S., Kondo, M., Takigawa, M., Hajima, T., and Watanabe, M.: Estimated regional CO<sub>2</sub> flux and uncertainty based on an ensemble of atmospheric CO<sub>2</sub> inversions, *Atmos. Chem. Phys.*, 22, 9215–9243, <https://doi.org/10.5194/acp-22-9215-2022>, 2022.

Kiel, M., O'Dell, C. W., Fisher, B., Eldering, A., Nassar, R., MacDonald, C. G., and Wennberg, P. O.: How bias correction goes wrong: measurement of XCO<sub>2</sub> affected by erroneous surface pressure estimates, *Atmos. Meas. Tech.*, 12, 2241–2259, <https://doi.org/10.5194/amt-12-2241-2019>, 2019.

Law, R. M., Peters, W., Rödenbeck, C., Aulagnier, C., Baker, I., Bergmann, D. J., Bousquet, P., Brandt, J., Bruhwiler, L., Cameron-Smith, P. J., Christensen, J. H., Delage, F., Denning, A. S., Fan, S., Geels, C., Houweling, S., Imasu, R., Karstens, U., Kawa, S. R., ... Zhu, Z.: TransCom model simulations of hourly atmospheric CO<sub>2</sub>: Experimental overview and diurnal cycle results for 2002. *Global Biogeochemical Cycles*, 22(3). <https://doi.org/10.1029/2007GB003050>, 2008.

O'Dell, C. W., Eldering, A., Wennberg, P. O., Crisp, D., Gunson, M. R., Fisher, B., Frankenberg, C., Kiel, M., Lindqvist, H., Mandrake, L., Merrelli, A., Natraj, V., Nelson, R. R., Osterman, G. B., Payne, V. H., Taylor, T. E., Wunch, D., Drouin, B. J., Oyafuso, F., Chang, A., McDuffie, J., Smyth, M., Baker, D. F., Basu, S., Chevallier, F., Crowell, S. M. R., Feng, L., Palmer, P. I., Dubey, M., García, O. E., Griffith, D. W. T., Hase, F., Iraci, L. T., Kivi, R., Morino, I., Notholt, J., Ohyama, H., Petri, C., Roehl, C. M., Sha, M. K., Strong, K., Sussmann, R., Te, Y., Uchino, O., and Velazco, V. A.: Improved retrievals of carbon dioxide from Orbiting Carbon Observatory-2 with the version 8 ACOS algorithm, *Atmos. Meas. Tech.*, 11, 6539–6576, <https://doi.org/10.5194/amt-11-6539-2018>, 2018.

Taylor, T. E., O'Dell, C. W., Baker, D., Bruegge, C., Chang, A., Chapsky, L., Chatterjee, A., Cheng, C., Chevallier, F., Crisp, D., Dang, L., Drouin, B., Eldering, A., Feng, L., Fisher, B., Fu, D., Gunson, M., Haemmerle, V., Keller, G. R., ... Zong, J.: Evaluating the consistency between OCO-2 and OCO-3 XCO<sub>2</sub> estimates derived from the NASA ACOS version 10 retrieval algorithm. *Atmospheric Measurement Techniques*, 16(12). <https://doi.org/10.5194/amt-16-3173-2023>, 2023.

This references are cited in the revised manuscript.
